# Supplementary material for: Esigenza di nuova cultura democratica in Italia, in the proceedings of the conference "Cultura e Democrazia nell'Europa che cambia di fronte alle sfide del duemila"
Source: Royal Society of Chemistry journal article supplement (doi:10.1039/c7cp03757k), 1992-01-01
Supplement: c7cp03757k1.pdf [file c7cp03757k1.pdf]

# Tunable in-plane torsional strength of surface functionalized two dimensional nanomaterials

Qianling Lin<sup>a</sup>, Yinfeng Li<sup>a,b,\*</sup>, Haimin Yao<sup>c</sup>

<sup>a</sup> Department of Engineering Mechanics, School of Naval Architecture, Ocean and Civil Engineering (State Key Laboratory of Ocean Engineering), Shanghai Jiao Tong University, Shanghai 200240, P.R. China

<sup>b</sup> Collaborative Innovation Center for Advanced Ship and Deep-Sea Exploration(CISSE), Shanghai 200240, P.R. China.

<sup>c</sup> Department of Mechanical Engineering, The Hong Kong Polytechnic University, Hong Kong, China

\* Authors to whom correspondence should be addressed. Electronic addresses: liyinfeng@sjtu.edu.cn (Y. Li)

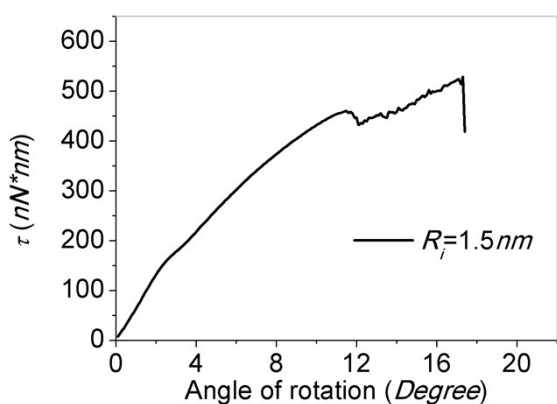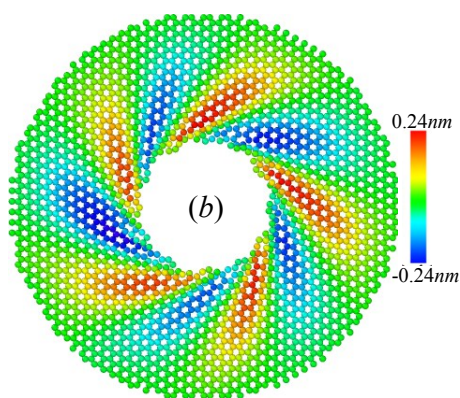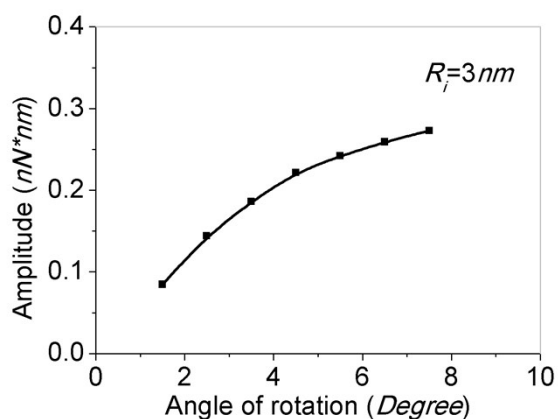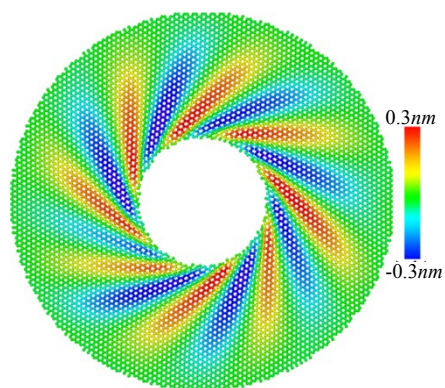

**Fig. S1** Mechanical characteristics of circular graphene annulus subjected to in-plane rotation at inner edge. *(a)* Atomistic model of circular under circular rotation at inner edge. The slave domain represents the inner and outer boundaries which are not plotted in other figures for clarity. *(a)* The change of torque in fully hydrogenated graphene annulus with  $R_i=1.5nm$  and  $R_o=4.5nm$  with the rotation angle. *(c)* Wrinkle contour of graphane annulus by coloring each atom according to the out-of-plane displacement. *(d)* The evolution of wrinkle amplitude with rotation angle. *(e)* Wrinkle amplitude contours of graphane annulus with  $R_i=3nm$ ,  $R_o=9nm$  at 1K by coloring each atom according to the out-of-plane displacement.

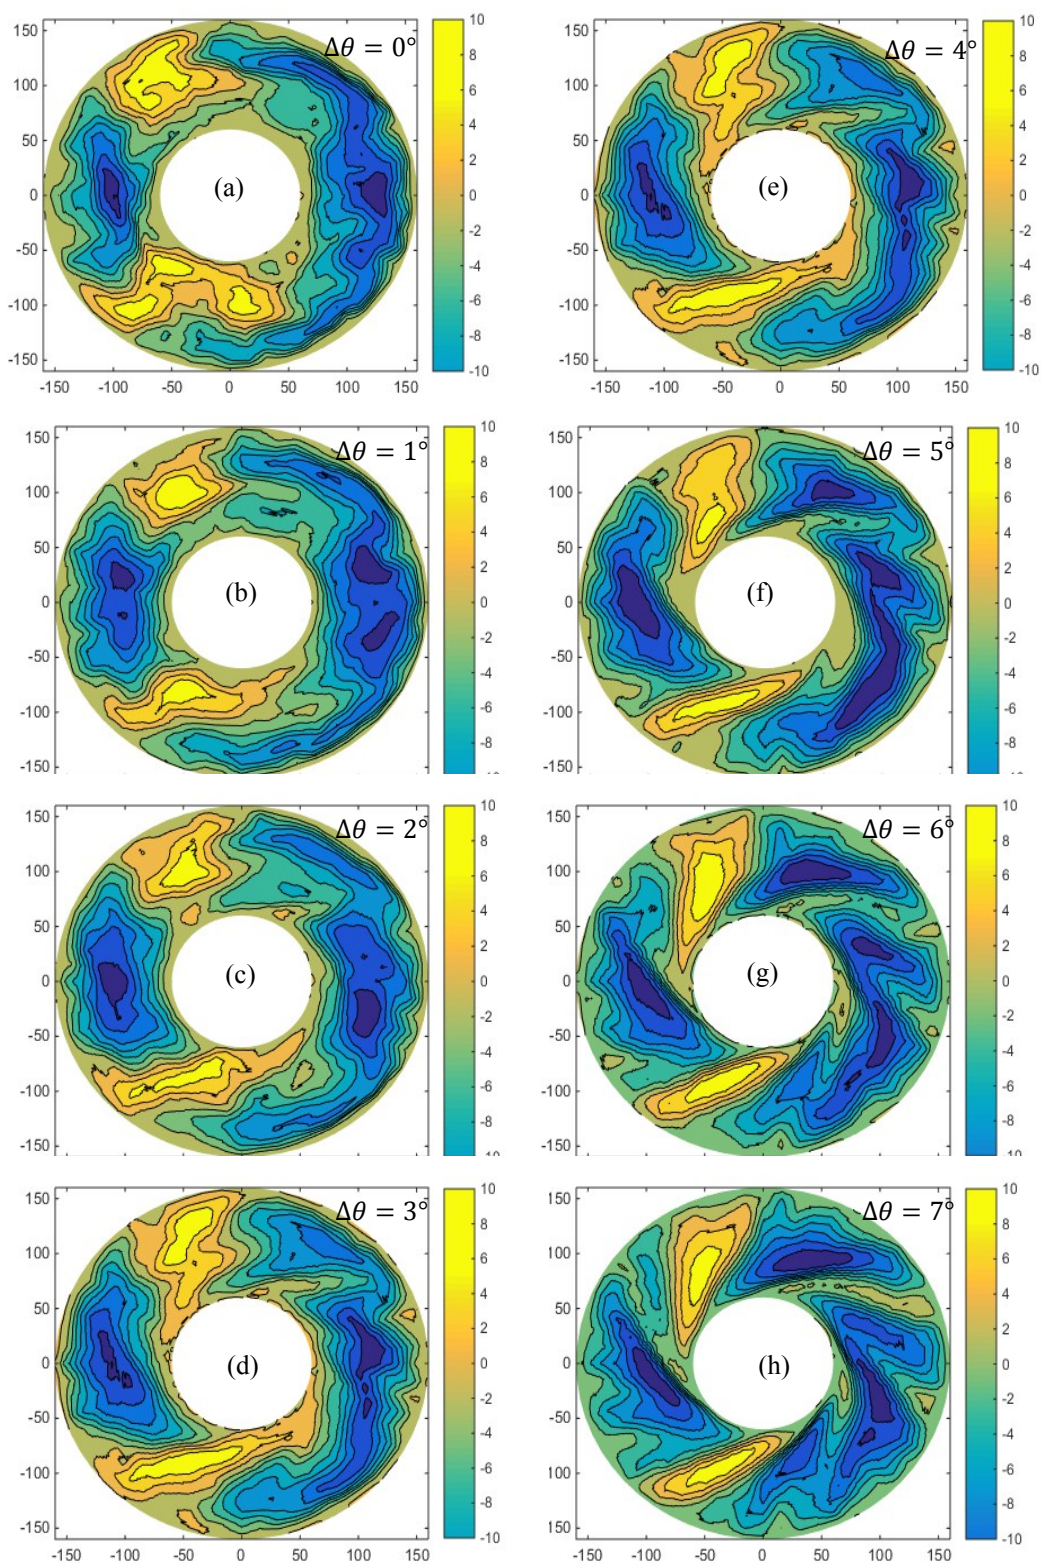

**Fig. S2** Out-of-plane deformations of the graphene layer. (a-h) Contour maps of circular hydrogenated graphene annulus under torsion angle  $\Delta\theta$  ranging from  $0^\circ$  to  $7^\circ$ . The surface morphology of relaxed



graphene is noticed to be different with that of graphene under in-plane rotation. Hydrogenated graphene at  $\Delta\theta=0^\circ$  has random out-of-plane deformation pattern while annulus at  $\Delta\theta>3^\circ$  shows unusual spiral wrinkling patterns.

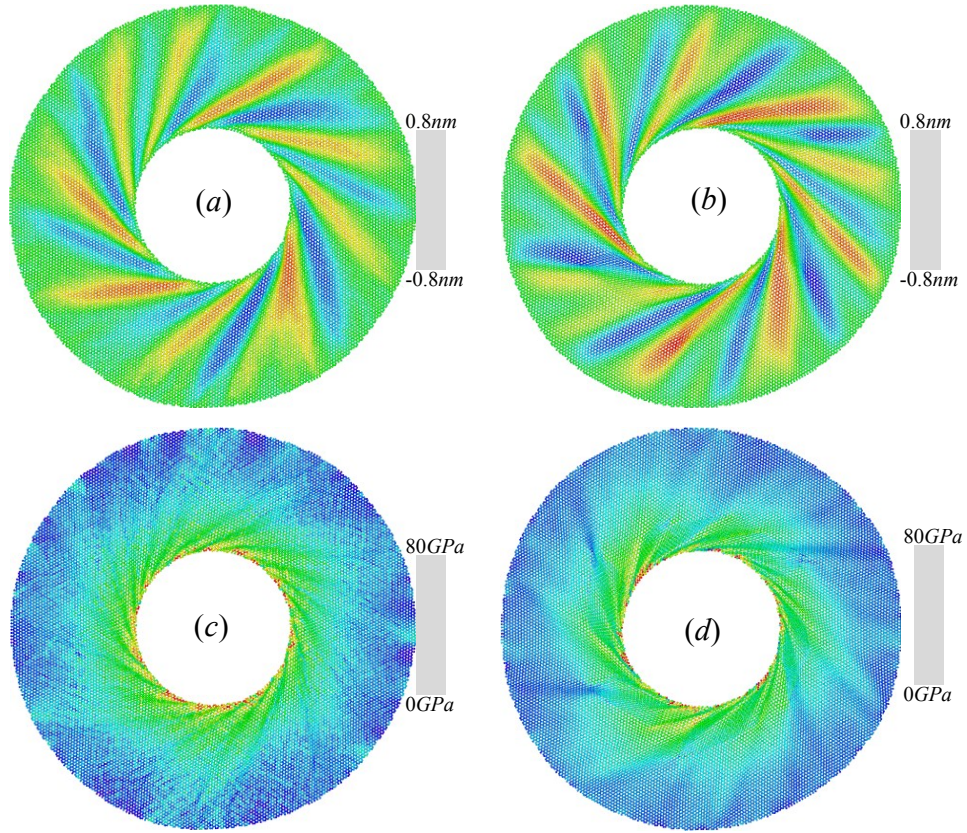

**Fig. S3** Enhanced out of plane deformation induced change of in-plane stress distribution. (a-b) Wrinkle amplitude contours of hydrogenated graphene annulus with hydrogenation ratio  $H=10\%$  and  $100\%$  at the critical rotation angle, and (c-d) the corresponding stress distributions for circular shear stress. Graphane annulus with larger wrinkle amplitude shows more severe wrinkling induced local stress state conversion, which agrees with the study reported by Li *et al*<sup>1</sup>.

## References

1. Y. Li, Q. Lin and D. Cui, *Sci. Rep.*, 2017, 7, 41767.
